# Supplementary material for: Microglia maintain structural integrity during fetal brain morphogenesis
Source: PubMed Central journal article supplement — Cell. 2024 Feb 15;187(4):962–980.e19. doi: 10.1016/j.cell.2024.01.012 (PMC10869139; doi:10.1016/j.cell.2024.01.012), 2024-02-15
Supplement: mmc2.pdf [file mmc2.pdf]

**Table S2. Table delineating lesion severity, related to Figures 4, S5, 5 and Star Methods**

This table shows lesion area ranges that were used to score lesion severity in Figure 4, Figure S5, and Figure 5.

| <b>Lesion area</b> | <b>E15.5</b>                 | <b>E18.5</b>                 | <b>P7</b>                    |
|--------------------|------------------------------|------------------------------|------------------------------|
| <b>Severity 0</b>  | 0-2,000 $\mu\text{m}^2$      | 0-2,000 $\mu\text{m}^2$      | 0-2,000 $\mu\text{m}^2$      |
| <b>Severity 1</b>  | 2,000-18,000 $\mu\text{m}^2$ | 2,000-18,000 $\mu\text{m}^2$ | 2,000-30,000 $\mu\text{m}^2$ |
| <b>Severity 2</b>  | >18,000 $\mu\text{m}^2$      | >18,000 $\mu\text{m}^2$      | >30,000 $\mu\text{m}^2$      |
